# Supplementary material for: A general photoiniferter approach to the surface functionalization of acrylic and methacrylic structures written by two-photon stereolithography
Source: Royal Society of Chemistry journal article supplement (doi:10.1039/d2nr06627k), 2023-01-01
Supplement: d2nr06627k1.pdf [file d2nr06627k1.pdf]

## Supporting information

### A general photoiniferter approach to the surface functionalization of acrylic and methacrylic structures written by two-photon stereolithography

*Ernesto III Paruli,<sup>a</sup> Valentina Montagna,<sup>a</sup> Mariano Garcia-Soto,<sup>a</sup> Karsten Haupt,<sup>\*a</sup> and*

*Carlo Gonzato<sup>\*a</sup>*

<sup>a</sup> Université de Technologie de Compiègne, CNRS Enzyme and Cell Engineering Laboratory,  
Rue du Docteur Schweitzer, CS 60319, 60203 Compiègne Cedex, France.

\*karsten.haupt@utc.fr ; carlo.gonzato@utc.fr

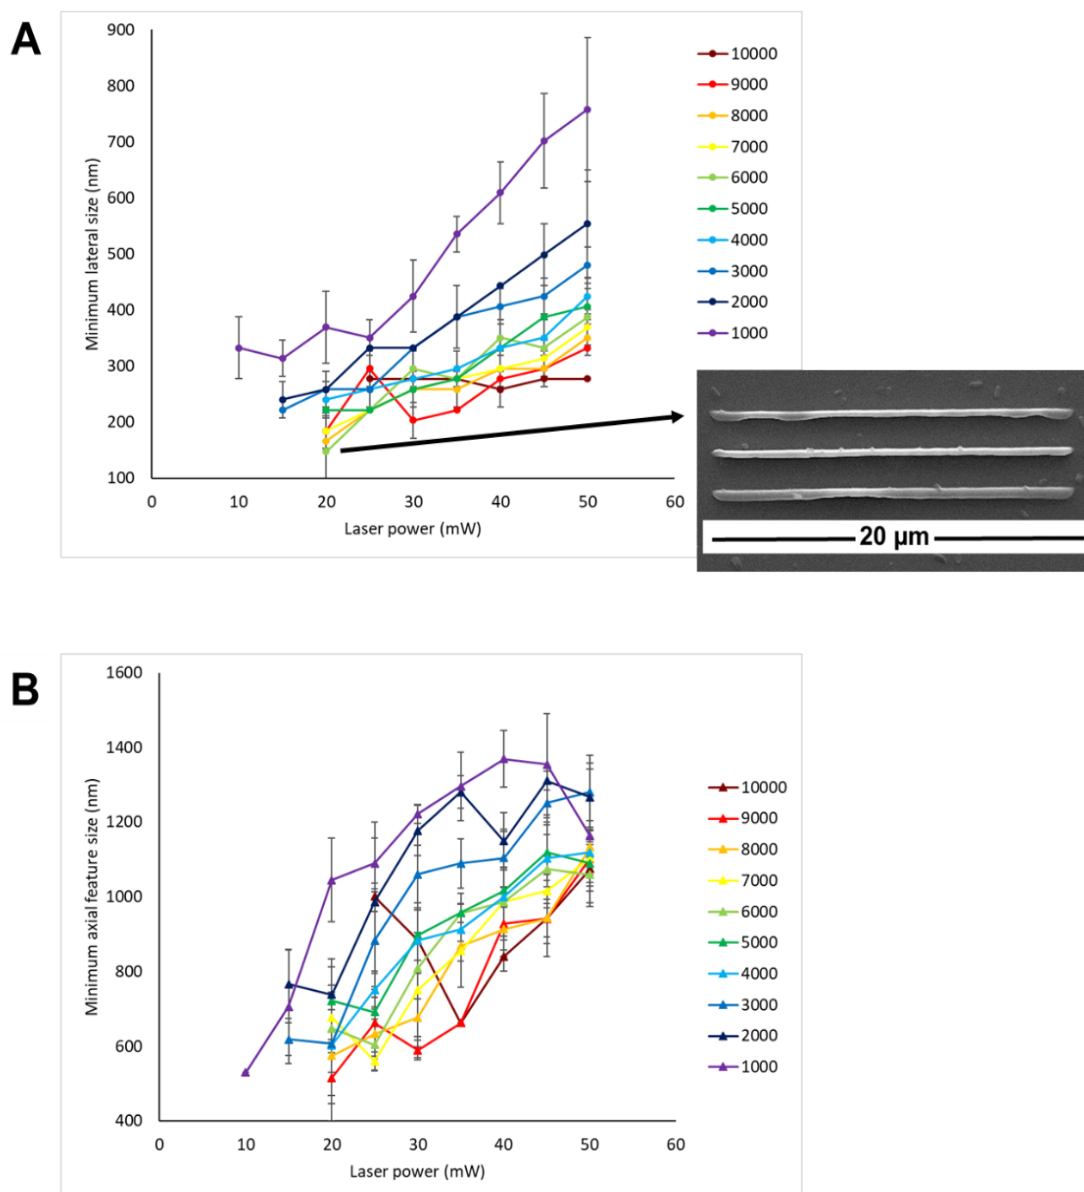

**Figure S1.** The minimum lateral feature size as a function of laser power at a fixed scan speed using the IP-Dip photoresin (n = 3). Outset: SEM image of triplicates of one-voxel-wide line with the smallest average minimum lateral feature size ( $147.7 \pm 64.0$  nm) generated using SS = 6000  $\mu\text{m/s}$ , LP = 20 mW. Legend shows scan speed values expressed in  $\mu\text{m/s}$ .

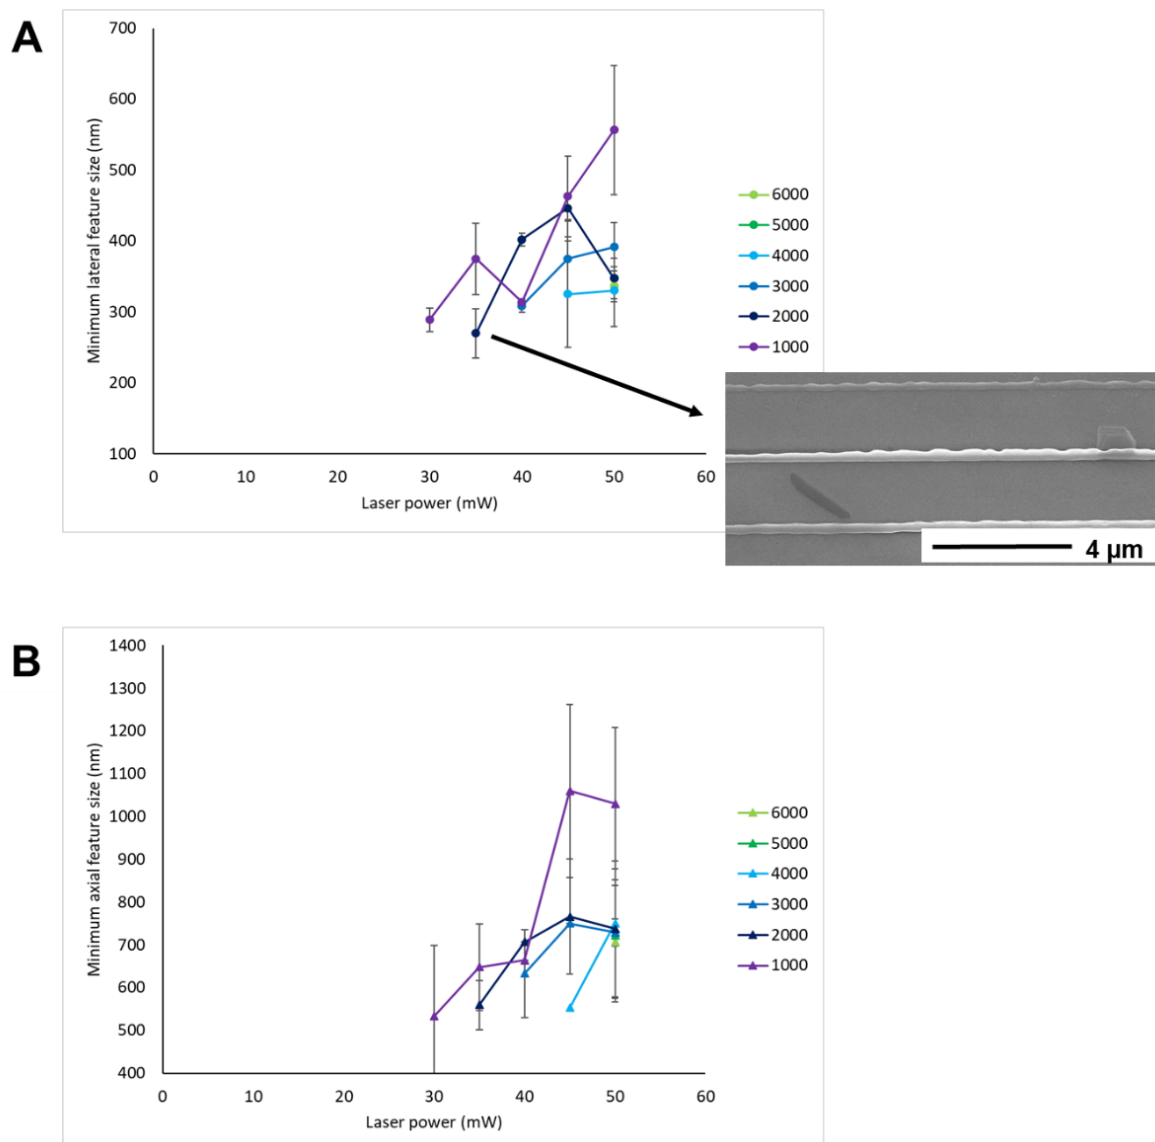

**Figure S2.** The minimum lateral feature size as a function of laser power at a fixed scan speed using the IP-S photoresin ( $n = 3$ ). Outset: SEM images of triplicates of one-voxel-wide line with smallest ( $270.0 \pm 34.8$  nm) average minimum lateral feature size generated using  $SS = 2000$   $\mu\text{m/s}$ ,  $LP = 35$  mW. Legend shows scan speed values expressed in  $\mu\text{m/s}$ .

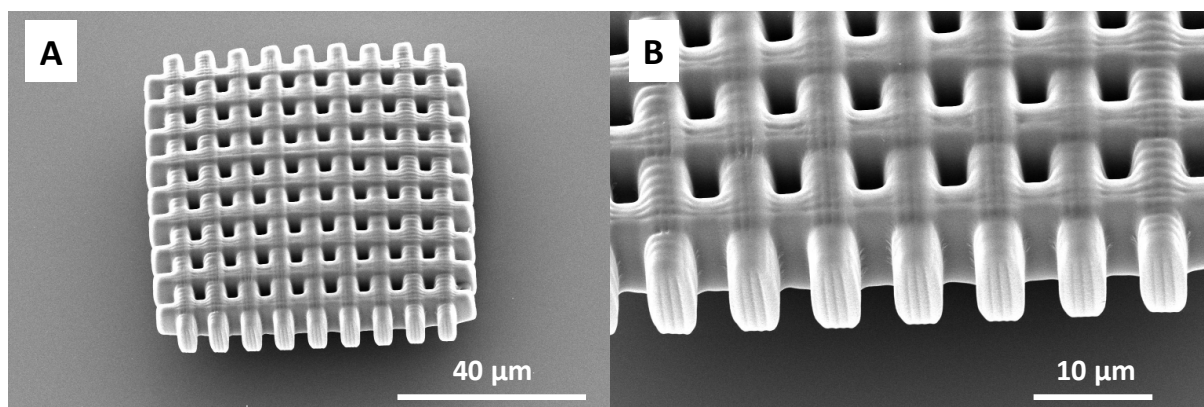

Figure S3. Representative SEM images of the printed woodpiles. (B) is a magnification of (A).

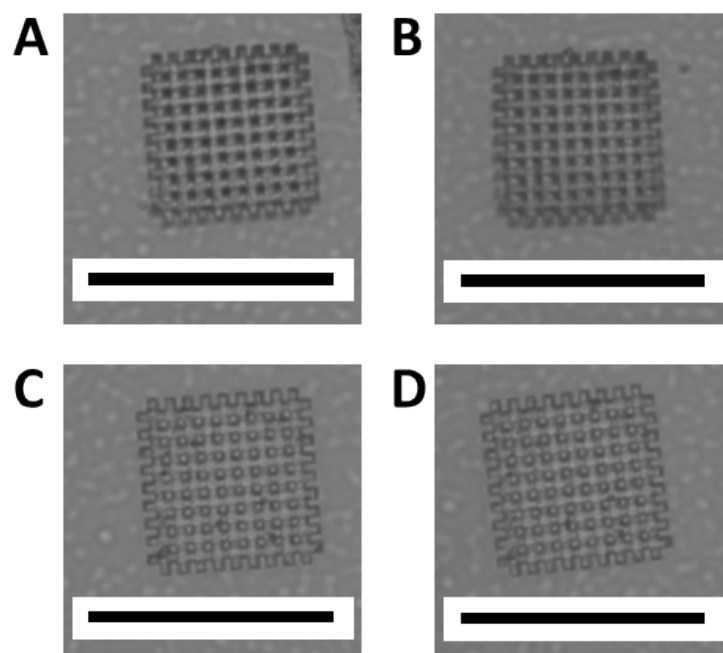

Figure S4. Brightfield microscopy image of bare microwoodpile (A) before and (B) after CDTPA-coupling and fluorescent polymer-grafting. Bare microwoodpile (C) before and (D) after fluorescent polymer-grafting without prior CDTPA-coupling. Scale bar = 100 μm.
